# Supplementary material
Source: PubMed Central journal article supplement (PMC2528092)

## SUPPLEMENTAL DATA

### Supplemental Method

#### Transient expression in Arabidopsis protoplasts and immunoprecipitation

The coding sequences of *SINAT5DN* and the *MtSINA* genes were cloned into a pRT104-derived vector (Töpfer et al., 1989) as N-terminal fusion with 3x HA and 3x MYC epitopes, respectively. Protoplasts from Arabidopsis ecotype Columbia were prepared as described (Dangl et al., 1987) and cotransfected with the polyethylene glycol-mediated method (Kiegerl et al., 2000). Proteins were obtained with extraction buffer (25 mM Tris-HCl, pH 7.6, 10 mM MgCl<sub>2</sub>, 15 mM EGTA, 15 mM NaCl, 15 mM pNO<sub>2</sub>PhenylPO<sub>4</sub>, 15 mM β-glycerophosphate, 1 mM dithiothreitol, 1 mM NaF, 0.1 mM Na<sub>3</sub>VO<sub>3</sub>, 0.5 mM phenylmethylsulfonylfluoride, 10 μg/ml leupeptin and aprotinin, 0.1% Tween, and 10% glycerol); total protein concentration was determined with the Protein Assay kit (Bio-Rad, Hercules, CA). For immunoprecipitation, 300 μg protein extract was incubated with rat monoclonal anti-HA antibody 3F10 (Roche Diagnostics, Brussels, Belgium) and 25 μl of protein G Sepharose 4 Fast Flow beads (GE-Healthcare, Little Chalfont, UK) for 2 h at 4°C. Immune complexes were washed 3 times in 500 μl extraction buffer and protein complexes coupled to the anti-HA Protein G beads were dissolved in Tris-glycine-SDS sample buffer (Novex, San Diego, CA) supplemented with 100 mM β-mercaptoethanol, boiled for 5 min at 95°C, and loaded on SDS-PAGE gels according to Laemmli (1970). Proteins were transferred electrophoretically onto an Immobilon-p polyvinylidene difluoride membrane (Millipore, Bedford, MA). After blocking at 4°C in 5% skimmed milk in 100 mM Tris-HCl, pH 7.5, 150 mM NaCl, and 0.1% Tween-20, the efficiency of the immunoprecipitation was verified with the monoclonal 12CA5 anti-HA mouse antibody (Roche Diagnostics). MYC-tagged proteins were detected with the monoclonal 9E10 anti-cMYC mouse antibody (Roche Diagnostics). The secondary anti-mouse-IgG antibody coupled to horseradish peroxidase was detected with a chemiluminescence detection kit according to the manufacturer's instructions (Perkin-Elmer Life Sciences, Boston, MA).

#### Literature cited

**Dangl JL, Hauffe KD, Lipphardt S, Hahlbrock K, Scheel D (1987)** Parsley protoplasts retain differential responsiveness to u.v. light and fungal elicitor. *EMBO J* **6**: 2551-2556

- Kiegerl S, Cardinale F, Siligan C, Gross A, Baudouin E, Liwosz A, Eklöf S, Till S, Bögre L, Hirt H, Meskiene I** (2000) SIMKK, a mitogen-activated protein kinase (MAPK) kinase, is a specific activator of the salt stress-induced MAPK, SIMK. *Plant Cell* **12**: 2247-2258
- Laemmli UK** (1970) Cleavage of structural proteins during the assembly of the head of bacteriophage T4. *Nature* **227**: 680-685
- Töpfer R, Gronenborn B, Schell J, Steinbiss H-H** (1989) Uptake and transient expression of chimeric genes in seed-derived embryos. *Plant Cell* **1**: 133-139

**Table S1.** Overview of primers used for amplifying ORFs, RT-PCR and qRT-PCR analyses

| Gene, use, amplicon length (bp)                                                           | Forward primer                | Reverse primer                 |
|-------------------------------------------------------------------------------------------|-------------------------------|--------------------------------|
| <i>SINAT5</i> ( product length 600 bp)                                                    | AAGCGTTTACGAGCTCCTTG          | CCCAGTGCCTCCAACCTTCTA          |
| <i>MtSINA1</i> , ORF, 999                                                                 | ATGGATTTGGATAGTATTGAGTGT      | TCAGCTGCAAAGATTTGGTATA         |
| <i>MtSINA2</i> , ORF, 969                                                                 | ATGATCAACCATTTCATATCTCAGATCT  | CTAGCTACACATGTTGGGTGTG         |
| <i>MtSINA3</i> , ORF, 912                                                                 | ATGACATCTAGTAATCCTTTCTTTGATGA | TCACTGCTCTTTCCAAATCCTT         |
| <i>MtSINA4</i> , ORF, 972                                                                 | ATGGAGTTGGATAGCATTGAGTGT      | TCAGCTACATAGATTAGGTATGCAC      |
| <i>MtSINA5</i> , ORF, 927                                                                 | ATGGATTCAGATAGTACTGTTTCTTCATT | CTAGCTACACAAGTTGGGTATGCA       |
| <i>MtSINA6</i> , ORF, 912                                                                 | ATGGCATTGAGTAATCCACTCTTT      | TCATTGTTCTTTCCAAATCCTACCA      |
| <i>MtSINA1</i> , qRT-PCR                                                                  | AGGGTACACCACGGAGTATTCG        | AGTTCCTTCCTATCACCACCAGAG       |
| <i>MtSINA2</i> , qRT-PCR                                                                  | AGCATATCCAACAACAATCGTGAC      | AACGGTTTTTCATGATTCAGCAAC       |
| <i>MtSINA3</i> , qRT-PCR                                                                  | CAGTCTTGAAGGAGGTGGTAATGG      | GCGGTGGCTTCCCTAATGC            |
| <i>MtSINA4</i> , qRT-PCR                                                                  | TTTGGTGAGAGTTGATGGAGTTGG      | TGACACTGGTGAATAGGAGGGTAC       |
| <i>MtSINA5</i> , qRT-PCR                                                                  | GTCTTCTTTCATCATTTCAAACATACCC  | ATCAATGAAGAAACAGTACTATCTGAATCC |
| <i>MtSINA6</i> , qRT-PCR                                                                  | TGAAAACCTCAAACCCACCAAAACC     | CCCAGCGGCCCTGAAGC              |
| Translation elongation factor 1 $\alpha$<br>( <i>MtELF1<math>\alpha</math></i> ), RT-PCR  | TTGGACATGTCGACTCTGGA          | GCCTGGGAGGTTCCAGTAA            |
| Translation elongation factor 1 $\alpha$<br>( <i>MtELF1<math>\alpha</math></i> ), qRT-PCR | ACTGTGCAGTAGTACTTGGTG         | AAGCTAGGAGGTATTGACAAG          |

**Supplemental Fig. S1.** Alignment of SINA protein sequences of *M. truncatula*, Arabidopsis, rice, poplar and Siah1. The RING finger motif and the SINA domain are marked by asterisks and dollar signs, respectively.

```

OsSINA5 1  -----MDMDSVECLSLPDS-SMDVDDVDGGGVSHHHHHHHALPPLPAGVAVGVGPGGRAFPKANVAGVGGGAAGAP 73
OsSINA1 1  -----MDVDSVECLSLPDS-SSSSGAGAGGGG-----GGGGGGVGAMDAADDVGLALHAHGALLAAAA 58
OsSINA3 1  -----MDMASIECVSYSDSMDDDDDDGVGVGVVSH-----LPRPILVKPSSAAAAVNVVVVSAGSGGGGAGG 61
PtSINA8 1  -----M-----
SINAT5 1  -----METDSIDSVIDD----DEIHQK-----HQFSSTKSQGG- 29
AtSINA4 1  -----METDSMECVSSTG---NEIHQNG-----NGHQSYQFSSTKTHGA 37
PtSINA7 1  -----MDFDNIECVSSSDGLDEDEIHHHNLQHHL-----HQFASPKPHVNNNSNG 47
PtSINA9 1  -----M-----VN-----NNHNNG 8
MtSINA1 1  -----MDLDSIECVSSSDGMDEDEIQHRILPHHQ-----QHHSSEFSSSLKPRS GG 47
MtSINA4 1  -----MELDSIECVSSSDGMDEDEIHS-----HHHHSEFSSSTKARNGG 39
AtSINA3 1  -----MDLDSMDCTSTMDVTDDEEIHQDR-----HSYASVSKHHHTN 37
PtSINA3 1  -----M-----
MtSINA2 1  MINHSYLRFHCDICLKMETGGVDSSILS-----LTMEEAEHHHH 40
MtSINA5 1  -----MDS---DSTVSS-----LIMDEDLHP-H 20
OsSINA6 1  -----MASVTYLDL---AHSEVIDPPKN-----EEMLDVTELVDD 32
OsSINA4 1  -----MASVTYIDD---SGSEVIDPPK-----TEVLDVTELAGD 31
PtSINA2 1  -----MT-----IRNKPEVIDPPQN-----KMDTDIVECVNS 27
PtSINA4 1  -----MASSNLFDDIRNKPEVIDPPQN-----KDLTDIGESVND 35
MtSINA3 1  -----MTSSNPFDDIRSRP-GVDPPQT-----EESTEIPELVND 34
MtSINA6 1  -----MALSNFLFDDIRSNI-DVDPPQK-----EESTDVGILVND 34
AtSINA2 1  -----MAPGGSALKEVMESNSTGMDYE-----VKTAKVEVNNNK 34
AtSINA1 1  -----MAPGGSALKEALESNSTGV DYE-----VKMAKVEANS-K 33
PtSINA6 1  -----MAPGGSALKEVLEFHSTVADCD-----VANSKSENNI-T 33
PtSINA10 1  -----MAPGGSALKEVLEL---VAECD-----IATSKSENNI-A 30
PtSINA1 1  -----M-----MATSAAELRGS 11
PtSINA5 1  -----MAPGGIINKEEIESRIAYLDHDTG-----HPATSNAELRGS 36
OsSINA2 1  -----MAPGSSIVTDIPESDCVSDGLS-----EALTGIRLDGDS 34
Siah1 1  -----M-----MSRQTATALPTGT 13

```

```

OsSINA5 74  AAGGAVAGGGGPGGPPATS-VHELLECPVCTNSMYPPIHQCHNGHTLCSTCKARVHNRCPCTCRQELGDIRCLALEKVAE 152
OsSINA1 59  AARAAACSKGGGGGAAAGS-VHELLECPVCTNSMYPPIHQCHNGHTLCSTCKARVHNRCPCTCRQELGDIRCLALEKVAE 138
OsSINA3 62  GGGGVGVVAGAP-AVPPATS-VHELLECPVCTNSMYPPIHQCHNGHTLCSTCKTRVHNRCPCTCRQELGDIRCLALEKVAE 139
PtSINA8 1  -----VHELLECPVCTNSMYPPIHQCHNGHTLCSTCKTRVHNRCPCTCRQELGDIRCLALEKVAE 59
SINAT5 29  -ATVVIS-----PATS-VYELLECPVCTNSMYPPIHQCHNGHTLCSTCKSRVHNRCPCTCRQELGDIRCLALEKVAE 98
AtSINA4 38  AAAAVTNIIVGPTATAPATS-VYELLECPVCTNSMYPPIHQCHNGHTLCSTCKRVHNRCPCTCRQELGDIRCLALEKVAE 116
PtSINA7 47  -IANVVG---GPTVIAPATS-VHELLECPVCTNSMYPPIHQCHNGHTLCSTCKTRVHNRCPCTCRQELGDIRCLALEKVAE 122
PtSINA9 8  -NTIVVG---GPTAIAPATS-VHELLECPVCTNSMYPPIHQCHNGHTLCSTCKTRVHNRCPCTCRQELGDIRCLALEKVAE 83
MtSINA1 48  NNNHGV1---GSTAIAPATS-VHELLECPVCTNSMYPPIHQCHNGHTLCSTCKTRVHNRCPCTCRQELGDIRCLALEKVAE 123
MtSINA4 40  ANINNIL---GPTAIAPATS-VHELLECPVCTNSMYPPIHQCHNGHTLCSTCKTRVHNRCPCTCRQELGDIRCLALEKVAE 115
AtSINA3 38  NNTTNVN-AAAGLLPTTTS-VHELLECPVCTNSMYPPIHQCHNGHTLCSTCKARVHNRCPCTCRQELGDIRCLALEKVAE 115
PtSINA3 1  -----VHELLECPVCTNSMYPPIHQCHNGHTLCSTCKTRVHNRCPCTCRQELGDIRCLALEKVAE 59
MtSINA2 41  QFSS--ISKLLNN-APTPTS-VHLLDLCPCVCTNSMYPPIHQCHNGHTLCSTCKTRVHNRCPCTCRQELGDIRCLALEKVAE 116
MtSINA5 21  QFSSSTSKLHNSNGTPTSTS-VHELLECPVCTNSMYPPIHQCHNGHTLCSTCKTRVHNRCPCTCRQELGDIRCLALEKVAE 99
OsSINA6 33  HTQHS PK-----PNAMVSGNVRELECPVCLNAMYPIHQCHNGHTLCSSGCKPRVHNRCPCTCRHELGNIRCLALEKVAA 106
OsSINA4 32  PVPHSPK-----PNVVVSSVRELECPVCLNAMYPIHQCHNGHTLCSSGCKPRVHNRCPCTCRHELGNIRCLALEKVAA 105
PtSINA2 28  PAKTALK-----PNVTVSSVRELECPVCLNAMYPIHQCHNGHTLCSSGCKPRVHNRCPCTCRHELGNIRCLALEKVAA 101
PtSINA4 36  PAQTALK-----PNVTVSSVRELECPVCLNAMYPIHQCHNGHTLCSSGCKPRVHNRCPCTCRHELGNIRCLALEKVAA 109
MtSINA3 35  PIQTUVK-----PNGTVSSVRELECPVCLNAMYPIHQCHNGHTLCSSGCKPRVHNRCPCTCRHELGNIRCLALEKVAA 108
MtSINA6 35  PAQTALK-----PTGTVLSSVRELECPVCLNAMYPIHQCHNGHTLCSSGCKPRVHNRCPCTCRHELGNIRCLALEKVAA 108
AtSINA2 35  PTKGSA--GIGKYGIHSNNGVYELLECPVCLNAMYPIHQCHNGHTLCSSGCKPRVHNRCPCTCRHELGNIRCLALEKVAA 112
AtSINA1 34  PTKSGSG--SIGKF--HSSNGVYELLECPVCLNAMYPIHQCHNGHTLCSSGCKPRVHNRCPCTCRHELGNIRCLALEKVAA 109
PtSINA6 34  PTKGTVV--LGGKHGVYSNNGVYELLECPVCLNAMYPIHQCHNGHTLCSSGCKPRVHNRCPCTCRHELGNIRCLALEKVAA 111
PtSINA10 31  PTKGTVV--LSGKHGVYSNNGVYELLECPVCLNAMYPIHQCHNGHTLCSSGCKPRVHNRCPCTCRHELGNIRCLALEKVAA 108
PtSINA1 12  HFRKAATP-NTGNLQKQSTSNMQLDLCPCVCTNSMYPPIHQCHNGHTLCSSGCKPRVHNRCPCTCRHELGNIRCLALEKVAA 90
PtSINA5 37  PFRKAATP-STGNLQKQSTSNMQLDLCPCVCTNSMYPPIHQCHNGHTLCSSGCKPRVHNRCPCTCRHELGNIRCLALEKVAA 115
OsSINA2 35  TCKPWSTS--LVTVELSSLTGLNDLLECPVCTNSMYPPIHQCHNGHTLCSSGCKPRVHNRCPCTCRHELGNIRCLALEKVAA 112
Siah1 14  SKCPPSQRPALTGTASNNDLASLLECPVCFDYVLPPIHQCHNGHTLCSSGCKPRVHNRCPCTCRHELGNIRCLALEKVAA 92

```

\*\*\*\*\*  
 \$\$\$\$\$\$\$\$\$\$

```

OsSINA5 153  SLELPCKYCSIGCPEIFPYYSKIKHEAQCSFRPNCPYAGSECAVAGDIPFLVAHLRDDHKVDMHSGCTFNHRVYKSNPR 232
OsSINA1 139  SLELPCKYCSIGCPEIFPYYSKIKHEAQCMFRPNCPYAGSECAVAGDIPFLVAHLRDDHKVDMHSGCTFNHRVYKSNPR 218
OsSINA3 140  SLELPCKYYSIGCPEIFPYYSKIKHEAQCFRPNCPYAGSECAVAGDIPFLVAHLRDDHKVDMHSGCTFNHRVYKSNPR 219
PtSINA8 60  SLELPCKYMSIGCPEIFPYYSKIKHEAICNFRPNCPYAGSECAVAGDIPFLVAHLRDDHKVDMHSGCTFNHRVYKSNPR 139
SINAT5 99  SLELPCKYNYIGCGLGIFPYYSKIKHEAQCFRPNCPYAGSECAVAGDIPFLVAHLRDDHKVDMHSGCTFNHRVYKSNPR 178
AtSINA4 117  SLELPCKEYNYIGCPEIFPYYSKIKHEAICNFRPNCPYAGSECAVAGDIPFLVAHLRDDHKVDMHSGCTFNHRVYKSNPR 196
PtSINA7 123  SLELPCKYNYIGCPEIFPYYSKIKHEAICNFRPNCPYAGSECAVAGDIPFLVAHLRDDHKVDMHSGCTFNHRVYKSNPR 202
PtSINA9 84  SLEFPCKEYNYIGCPEIFPYYSKIKHEAICNFRPNCPYAGSECAVAGDIPFLVAHLRDDHKVDMHSGCTFNHRVYKSNPR 163
MtSINA1 124  SLELPCKYYSIGCPEIFPYYSKIKHEAICNFRPNCPYAGSECAVAGDIPFLVAHLRDDHKVDMHSGCTFNHRVYKSNPR 203
MtSINA4 116  SLELPCKYYSIGCPEIFPYYSKIKHEAICNFRPNCPYAGSECAVAGDIPFLVAHLRDDHKVDMHSGCTFNHRVYKSNPR 195
AtSINA3 116  SLELPCKHMSIGCPEIFPYYSKIKHEAICNFRPNCPYAGSECAVAGDIPFLVAHLRDDHKVDMHSGCTFNHRVYKSNPR 195
PtSINA3 60  SLELPCKYMSIGCPEIFPYYSKIKHEAICNFRPNCPYAGSECAVAGDIPFLVAHLRDDHKVDMHSGCTFNHRVYKSNPR 139
MtSINA2 117  SLEFPCKYYSIGCPEIFPYYSKIKHEAICNFRPNCPYAGSECAVAGDIPFLVAHLRDDHKVDMHSGCTFNHRVYKSNPR 196

```



**Supplemental Fig. S2.** Nucleotide sequence alignment (690 bp assembled conserved regions) used to design the phylogenetic tree shown in Fig. 1B.

|          |                                                      |       |
|----------|------------------------------------------------------|-------|
| OsSINA5  | AGCGTGGAGCTGCTCGAGTGCCCCGTCTGCAACATGTTCCCGCCCATCCA   | [50]  |
| OsSINA1  | AGCGTGGAGCTGCTCGAGTGCCCCGTCTGCAACATGTACCCGCCGATCCA   | [50]  |
| OsSINA3  | AGCGTCGAGCTGCTCGAGTGCCCCGTCTGCAACATGTACCCGCCCATCCA   | [50]  |
| PtSINA8  | ---GTTGAGCTCCTTGAATGCCCTGTTTGTAAATATGTACCCTCCTATTCA  | [47]  |
| PtSINA3  | ---GTTGAGCTCCTTGAATGCCCTGTTTGTAAATATGTACCCTCCTATTCA  | [47]  |
| PtSINA7  | AGTGTGAGCTCCTAGAAATGTCCTGTTTGTAAATATGTACCCACCAATTCA  | [50]  |
| PtSINA9  | AGTGTGAGCTGCTAGAAATGTCCTGTTTGTAAATATGTACCCACCAATCCA  | [50]  |
| MtSINA1  | AGTGTGAGTTGTTGGAATGTCCTGTTTGTAAATATGTATCCTCCAATTCA   | [50]  |
| MtSINA4  | AGTGTGAAATGCTTGAATGTCCTGTTTGTAAATATGTACCCTCCTATTCA   | [50]  |
| AtSINA3  | AGTGTGAGCTTCTCGAATGTCCTGTCTGCAATATGTACCCTCCCATCCA    | [50]  |
| MtSINA2  | AGTGTGATCTTCTTGAATGTCCGGTTTGTAAATATGTACCCTCCAATCCA   | [50]  |
| MtSINA5  | AGTGTGAGCTTCTTGAATGTCCTGTTTGTAAATATGTACCCTCCAATCCA   | [50]  |
| SINAT5   | AGCGTTGAGCTCCTTGAATGCCCTGTCTGCAATATGTACCCACCAATCCA   | [50]  |
| AtSINA4  | AGCGTGGAGCTTCTGGAGTGCCCTGTCTGTTATATGTATCCTCCTATCCA   | [50]  |
| OsSINA6  | GGCGTGGAGCTACTGGAATGCCCTGTGTGTAATATGTATCCTCCAATTCA   | [50]  |
| OsSINA4  | AGCGTGGAACTGCTTGAATGTCCAGTCTGCAGCATGTATCCTCCCATCCA   | [50]  |
| PtSINA2  | AGCGTTGAATTATTGGAGTGTCCCGTGTGCAATATGTATCCTCCAATTCA   | [50]  |
| PtSINA4  | AGCGTTGAATTACTGGAGTGTCCCGTGTGCAATATGTATCCTCCAATTCA   | [50]  |
| MtSINA3  | AGCGTTGAGCTTTTAGAGTGCCCTGTGTGCAATATGTACCCTCCAATCCA   | [50]  |
| MtSINA6  | AGCGTTGAGCTTCTAGAGTGTCCGTGTGTAATATGTACCCTCCAATCCA    | [50]  |
| AtSINA2  | AATGTTGAGCTTCTTGAATGTCCCGTCTGTAATATGTACCCTCCAATCCA   | [50]  |
| AtSINA1  | AATGTTGAGCTCCTTGAATGTCCGGTTTGTAAATATGTATCCTCCAATTCA  | [50]  |
| PtSINA6  | AATGTGGAGCTCCTTGAGTGTCCCTGTCTGTAATATGTACCCTCCAATCCA  | [50]  |
| PtSINA10 | AATGTGCAACTCCTTGAGTGTCCCTGTCTGTAATATGTATCCTCCAATTCA  | [50]  |
| PtSINA1  | AGTATGGACCTTCTTGACTGTCCCTGTTTGCCTATGTACCCTCCAATTTT   | [50]  |
| PtSINA5  | AGTATGGACCTTCTTGATTGTCCCTGTTTGTACCATGTATCCTCCAATTTT  | [50]  |
| OsSINA2  | ACGTTGGATTTGCTCGAGTGTCCAGTCTGCAACATGCGCCACCTATACT    | [50]  |
| Siah1    | AATTTGAGTCTTTTTGAGTGTCCAGTCTGCGACGTGTTACCGCCCATCT    | [50]  |
|          |                                                      |       |
| OsSINA5  | CCAGTGAATGGACACACTTTATGTTTCATGCAAGAGAGTCAACCGGTGCC   | [100] |
| OsSINA1  | CCAGTGAATGGACACACTCTGTGTTCCCTGCAAAAGGGTGAACCGTTGCC   | [100] |
| OsSINA3  | CCAGTGAATGGTCATACTCTGTGTTTCATGCAAAAGAGTGAACCGGTGCC   | [100] |
| PtSINA8  | TCAGTGAATGGCCATACACTCTGTTCATGTAAACGAGTAAATCGGTGTC    | [97]  |
| PtSINA3  | TCAGTGAATGGCCACACACTCTGTTCATGTAAACGAGTAAATCGGTGCC    | [97]  |
| PtSINA7  | TCAGTGAATGGGCACACGCTATGTTCCCTGTAAGAGGGTAAATCGCTGCC   | [100] |
| PtSINA9  | TCAGTGAATGGGCACACGCTATGTTCCCTGTAAGAGGGTAAATCGCTGCC   | [100] |
| MtSINA1  | TCAGTGAACGGTCACACATTGTGTTCCCTGTAAGAGGGTAAATCGATGTC   | [100] |
| MtSINA4  | CCAGTGAATGGCCACACACTATGTTCCCTGCAAAAGAGTGAACCGATGTC   | [100] |
| AtSINA3  | TCAGTGAATGGACATACGTTGTGTTTCATGTAAAGAGGGTAAACCGCTGCC  | [100] |
| MtSINA2  | TCAGTGAATGGACATACCCCTTTGTTTCATGTAAAGAGGGTAAACAGATGTC | [100] |
| MtSINA5  | TCAGTGAATGGGCATACCCCTATGTTTCATGTAAAGAGGGTAAACAGGTGCC | [100] |
| SINAT5   | TCAGTGAATGGACATACTTTATGTTTCATGTAAAGAGTGAATCGGTGTC    | [100] |
| AtSINA4  | TCAGTGAATGGACATACATTGTGCTCGTGTAAAGAGGGTAAACAGGTGTC   | [100] |
| OsSINA6  | TCAGTGAATGGTCATACTCTATGTTCCCTGCAAGAGGGTAAACCGCTGCC   | [100] |
| OsSINA4  | TCAGTGAATGGTCATACTCTATGTTCCCTGCAAAAGGGTAAATCGCTGTC   | [100] |
| PtSINA2  | TCAGTGAATGGTCACACATTATGTTCCCTGCAAGAGAGTTGGCCGATGCC   | [100] |
| PtSINA4  | CCAGTGAATGGCCACACATTATGTTCTTGTCAAGAGGGTAAACCGATGCC   | [100] |
| MtSINA3  | CCAGTGAATGGTCACACTCTATGCTCCTTGTCAAAAGAGTGCACCGGTGCC  | [100] |
| MtSINA6  | TCAGTGAATGGTCACACTATATGCTCATGCAAAAGAGTAAACCGGTGCC    | [100] |
| AtSINA2  | TCAGTGAATGGCCACACATTATGTTTCATGCAAAAGAGTGAACACATGCC   | [100] |
| AtSINA1  | TCAGTGAACGGCCACACATTGTGTTTCATGCAAAAGAGTGAACACATGCC   | [100] |
| PtSINA6  | CCAGTGAATGGACACACTTTATGTTTCGTGCAAGAGAGTAAACTGTTGCC   | [100] |
| PtSINA10 | CCAGTGAATGGACACACTCTATGTTTCATGCAAGAGAGTAAACTGTTGCC   | [100] |
| PtSINA1  | CCAGTGAATGGCCACACTCTATGTTTCATGCAAGAGAGTAAACTGTTGCC   | [100] |
| PtSINA5  | CCAGTGAATGGCCACACTCTATGTTTCATGCAAGAGAGTGAACACTGTTGCC | [100] |
| OsSINA2  | GCAGTGAATGGTCACACAATATGCTCCTTGTCAAGAGGGTGAATCATTGCC  | [100] |
| Siah1    | TCAATGTAGTGGCCATCTTGTGTTGTAGCTGTGCAAGCTC---TGTTGTC   | [97]  |

OsSINA5 CTACCTGCAGACAAGAGCTCGGTGATATTAGGTGCTTGGCACTGGAGAAA [150]  
OsSINA1 CTACATGCAGACAAGAGCTTGGTGTATATCAGGTGTTTGGCCCTGGAGAAA [150]  
OsSINA3 CAACCTGTCGACAGGAGCTTGGTGTATATTAGATGTCTAGCATTGGAGAAA [150]  
PtSINA8 CCACCTGTAGACAGGAGCTTGGTGTACATTAGATGTCTAGCTTTGGAAAAA [147]  
PtSINA3 CCACTTGTAGACAGGAGCTTGGTGTACATTAGATGTCTAGCATTGGAAAAA [147]  
PtSINA7 CCACATGTAGGCAGGAGCTTGGAGACATTAGATGTTTGGCCCTAGAAAAAG [150]  
PtSINA9 CTACTTGCAGGCAGGAGCTCGGAGACATTAGGTGTTTAGCCCTAGAGAAG [150]  
MtSINA1 CGACCTGTAGACAAGAGCTTGGAGATATTAGGTGTCTGGCACTGGAAAAAG [150]  
MtSINA4 CGACTTGTAGACAAGAGCTTGGAGATATCAGGTGTCTAGCACTGGAGAAG [150]  
AtSINA3 CAACTTGTAGACAAGAGCTCGGTGATATCCGTTGTTTGGCACTGGAAAAA [150]  
MtSINA2 CAACTTGCAGGCAAGAGCTAGGCGATATAAGGTGTTTAGCATTGGAGAAA [150]  
MtSINA5 CAACTTGCAGACAGGAAGCTGGGCGATATTCCGTTGTTTAGCATTGGAAAAA [150]  
SINAT5 CAACGTGTAGACAAGAGCTTGGAGATATTAGATGTTTAGCTCTTGAGAAA [150]  
AtSINA4 CCACATGTAGACAAGAAGCTTGGAGATATTAGATGTTTAGCTCTTGAGAAA [150]  
OsSINA6 CAACTTGCAGACATGAATTGGGTAACATAAGATGCCTTGCTCTGGAAAAAG [150]  
OsSINA4 CAACTTGTAGGCATGAAGTGGGTAATATTAGATGTCTTGCTCTCGAGAAG [150]  
PtSINA2 CCATTTGCAGGCATGAAGTGGCAACATTAGATGTCTTGCGCTAGAGAAA [150]  
PtSINA4 CCACTTGCAGGCACGAAGCTCGGCAACATTAGATGTCTTGCACTAGAGAAA [150]  
MtSINA3 CTACTTGTGCGCATGAGCTCGGCAATATTAGATGTCTGGCATTGGAGAAG [150]  
MtSINA6 CTACTTGTAGGCATGAGCTGGGAAATATTAGATGTCTAGCACTGGAGAAG [150]  
AtSINA2 CTACATGTCGCTACGAGCTTGGTAACATAAGATGCTTAGCTCTTGAGAAA [150]  
AtSINA1 CTACTGCCGCTATGAGCTTGGTAACATAAGATGCTTAGCTCTTGAGAAG [150]  
PtSINA6 CTACTTGCCGCTATGATCTTGGAAATATACGCTGTTTGGCTTTGGAGAAA [150]  
PtSINA10 CTACTTGCCGCTATGATCTTGGAAATATACGGTGCTTGGCTTTGGAGAAA [150]  
PtSINA1 CAATTTGCCGAGGAGAGCTAGGAAATATAAGGTGCTTGGCTCTGGAAAAA [150]  
PtSINA5 CAATTTGCCGAGGAGAAGCTAGGAAATATAAGGTGCTTGGCTCTGGAGAAA [150]  
OsSINA2 CTACTTGTGCGCAAGAAGCTGGGTAATATCAGATGTTTGGCTCTTGAGAAG [150]  
Siah1 CAACTTGCCGGGGCCCTTTGGGATCCATTGCAACTTGGCTATGGAGAAA [147]

OsSINA5 GTAGCAGAGTCACTCGAGCTTCCTTGCAAGTATTCTTTAGGTTGCATTTT [200]  
OsSINA1 GTAGCTGAATCGCTTGGAGCTTCCCTGTAAGTACTCTTTGGGGTGCATCTT [200]  
OsSINA3 GTGGCTGAATCGCTTGGAGCTACCCTGCAAAATATTCACTAGGTTGTATCTT [200]  
PtSINA8 GTAGCTGAATCACTCGAGCTACCTTGCAAAATACTCACTTGGATGCATTTT [197]  
PtSINA3 GTAGCTGAATCACTTGGAGCTGCCTTGCAAAATACTCGCTTGGATGCATTTT [197]  
PtSINA7 GTGGCTGAGTCACTAGAAGCTGCCTTGCAAAATAACTTGGGGTGCATATT [200]  
PtSINA9 GTGGCTGAGTCACTGGAATTTCCCTTGCAAAATTAAGTGGGGTGCATATT [200]  
MtSINA1 GTTGCTGAATCACTCGAGTTACCATGCAAAATACTCTCTTGGATGTATCTT [200]  
MtSINA4 GTGGCTGAATCACTTGAAGTTACCCTGCAAGTACTCCCTCGGATGTATATT [200]  
AtSINA3 GTAGCCGAATCACTTGAATTTCCCTGTAAACACTCACTTGGATGTATCTT [200]  
MtSINA2 ATAGCAGAATCACTTGAATTTCCCTGTAGATACTCTCTTGGTTGTATATT [200]  
MtSINA5 ATAGCAGAATCACTTGAATTTCCCTGCGATACTCTGTTGGCTGTATATT [200]  
SINAT5 GTAGCTGAGTCGCTTGGAGTTACCCTGCAAGTATAATCTTGGATGCATTTT [200]  
AtSINA4 GTAGCCGAGTCGCTTGGAGCTGCCTTGCAAGTTAATCTGGGATGTATCTT [200]  
OsSINA6 GTAGCTGCATCACTAGAGCTTCCATGCAAAATAACTTTGGGGTGCATATA [200]  
OsSINA4 GTGGCTGCGTCGCTTGAAGTTCCATGCAAGTACAAGTTCGGGTGTATTTA [200]  
PtSINA2 GTTGCTGCATCTCTTGAAGTTCCATGTATTTATAGTTTTGGGTGCATATA [200]  
PtSINA4 GTTGCTGCATCTCTTGAAGTTCCATGTAAATATAGTTTTGGGTGCATATA [200]  
MtSINA3 GTGGCTGCATCACTAGAAGTTCCGTGTAATATGGTTTTGGGTGCATATA [200]  
MtSINA6 GTGGCTGCATCTTTTGCCTCCCTGTAAATTCGATTTTGGGTGCATATA [200]  
AtSINA2 GTTGCGAGTCTTTGGAAGTTCCATGCCGGTACAATTTGGGGTGTATTTT [200]  
AtSINA1 GTTGCGGAATCATTGGAAGTTCCATGCCGGTACAATTTAGGGTGTATTTT [200]  
PtSINA6 GTTGCGAATCATTGGAGCTGCCCTGCAAAATTCAGCTTAGGATGCATTTT [200]  
PtSINA10 GTTGCGAATCATTGGAGCTGCCCTGCAAAATACAGTTTAGGATGTGTTTT [200]  
PtSINA1 ATTGCTGAGTCAATAGAAGTTCCCTGCATGTACAGTGGGGATGTATATT [200]  
PtSINA5 ATTGCCGAGTCAATAGAAGTTCCCTGCAAAATACAGTATGGGATGTATATT [200]  
OsSINA2 GTGGCTGAGTCACTTCCAGCTTCCATGCAAAATATAGCCTAGGCTGTATTCA [200]  
Siah1 GTGGCTAATTCAGTACTTTTCCCTGTAAATATTCTTCTGGATGTACTCT [197]

OsSINA5 TCCATACTACAGCAAGATAAAGCATGAATGCTTTAGGCCATATAACTGCC [250]  
OsSINA1 CCCATACTACAGCAAGATAAAACATGAATGCTTTAGACCATAACAATTGCC [250]  
OsSINA3 TCCGTACTACAGCAAACTCAAGCATGAATGCTTCAGGCCATAACAAGTCC [250]

PtSINA8 TCCATACTACAGTAAACTAAAACATGAGTGCTTTAGGCCATACAACCTGTC [247]  
 PtSINA3 TCCATACTACAGTAAACTGAAACATGAGTGCTTTAGGCCATACAGCTGTC [247]  
 PtSINA7 TCCATATTACAGCAAGCTCAAGCACGAGTGCTTCAGACCATATAAATTGCC [250]  
 PtSINA9 TCCATATTACAGCAAGCTCAAGCACGAGTGCTTCAGACCATATAAATTGCC [250]  
 MtSINA1 TCCATACTACAGCAAGCTGAAGCATGAGTGCTTTAGACCATACACTTGTC [250]  
 MtSINA4 TCCATACTACAGCAAGCTTAAGCATGAGTGTTTTAGACCTTATAGTTGTC [250]  
 AtSINA3 CCCTTATTACAGTAAGCTCAAACATGAGTGTTTCAGACCTTATAGCTGCC [250]  
 MtSINA2 TCCATATTTTAGCAAACCTCAAACATGAGTGTTTTAGACCATACAATTGCC [250]  
 MtSINA5 TCCCTATTACAGCAAACCTCAAACACGAGTGTTTCAGACCTTATAACTGCC [250]  
 SINAT5 CCCTTATTACAGTAAACTAAAGCATGAGTGTTTTAGACCTTATAGTTGTC [250]  
 AtSINA4 TCCTTACTACAGCAAACCTGAAGCACGAGTGTTTCAGACCTTACAGTTGTC [250]  
 OsSINA6 TCCTTATTACTGCAAGCTGAAGCATGAGTGCTACAGGCCCTATACTTGCC [250]  
 OsSINA4 TCCTTACTACTGCAAGCTGAAGCATGAGTGCTATAGGCCCTTATAGCTGTC [250]  
 PtSINA2 CCCTTATCACAGCAAGTCAAACATGAATGTTTTAGACCGTATAGCTGCC [250]  
 PtSINA4 CCCTTATTACAGCAAGCTAAAACATGAATGTTTTAGACCATATAACTGCC [250]  
 MtSINA3 CCCATATTACAGCAAGCTAAAACATGAGTGTTTTAGACCCTATAACTGTC [250]  
 MtSINA6 TCCATACTACAACAAGCCAGAACATGAATGTTATAGACCCTATAACTGTC [250]  
 AtSINA2 CCCTTACTACAGCAAGCTTAAGCACGAGTGCTTTAGGCCTTACACTTGCC [250]  
 AtSINA1 CCCATACTACAGCAAGCTCAAGCACGAGTGCTTTTCGATCCTACAGCTGTC [250]  
 PtSINA6 CCCATACTACAGCAAGCTCAAGCATGAGTGTTTCCGTCCATATAGCTGTC [250]  
 PtSINA10 CCCATACTACAGCAAGCTCAAGCATGAATGTTTTCCGTCCATATAGCTGCC [250]  
 PtSINA1 TCCCTACTACAGCAAGCCAAAACATGAATGCTATCGTCCATACAACCTGCC [250]  
 PtSINA5 TCCCTACTACAGCAAGCCAAAACATGAATGCTATCGCCCATACAACCTGCC [250]  
 OsSINA2 TCCTTACCAAAAACAACTTAAGCATGAGTGCTTCAGGCCATATAGTTGTC [250]  
 Siah1 GCCACACACAGAAAAAGCAGACCATGAATGTTTTAGGCCTTATTCCTGTC [247]

OsSINA5 CTTATGCTGGTCTGAATGTGGTGATATTCTTGTTTCATTTGAGGGACGAC [300]  
 OsSINA1 CTTATGCTGGTCTGAGTGTGGTGATATCCTTGTTTCATTTGAGGGATGAT [300]  
 OsSINA3 CTTATGCTGGCTCTGAATGCGGGGATATTCTAGTTCATCTGAGGGATGAC [300]  
 PtSINA8 CATATGCTGGATCAGAGTGTGGGGATATCCTTGTTTCATCTGAGGGATGAT [297]  
 PtSINA3 CATATGCTGGATCAGAGTGTGGGGATATCCTTGTTTCATCTGAGGGATGAT [297]  
 PtSINA7 CCTATGCTGGATCAGAATGCGGGGACATCCTAGTTCATCTAAGGGATGAT [300]  
 PtSINA9 CCTATGCTGGATCAGAATGCGGAGATATTCTGGTTCATCTAAGGGATGAT [300]  
 MtSINA1 CTTATGCTGGATCAGAGTGTGGGATATTCTTGTTTCATTTGAGGGACGAT [300]  
 MtSINA4 CTTATGCTGGATCAGAGTGTGGGATATTCTCGTTCATTTGAGGGATGAT [300]  
 AtSINA3 CTTATGCTGGATCCGAGTGTGGCGATATCTTAGTTCATCTGAGGGATGAT [300]  
 MtSINA2 CTTATGCTGGATCAGACTGTGGAATATTCTTGTTTCATTTAAGGGATGAC [300]  
 MtSINA5 CTTATGCCGGATCAGACTGTGGTGATATTCTTGTTTCATTTAAGGGACGAC [300]  
 SINAT5 CATATGCTGGCTCGGAGTGTGGTGACATTCTTGTTTCATTTAAGGGATGAT [300]  
 AtSINA4 CTTATGCTGGTTCGGAGTGTGGGGACATCCTTGTTTCATCTCAGGGATGAT [300]  
 OsSINA6 CATATGCTGGATCTGAATGCGGTGACATTCTAGTACACTTGAAAGATGAT [300]  
 OsSINA4 CATATGCTGGATCTGAATGCGGTGACATTTTGGTGCACCTTGAAAGATGAC [300]  
 PtSINA2 CATATCTGGATCAGAATGCGGTGATATTCTGGTGCATTTGAAAGATGAT [300]  
 PtSINA4 CATATGCTGGATCAGAATGCGGTGATATTCTGGTGCATTTGAAAGATGAT [300]  
 MtSINA3 CATATGCTGGCTCAGAATGTGGTGATGTATTGGTGCACCTGAAAGATGAT [300]  
 MtSINA6 CATATGCTGGTTCAGAATGCGGTGATATATTGGTGCATCTGAAAGAAGAT [300]  
 AtSINA2 CTTATGCTGGTCTGAGTGTGGTGATATCCTTGTTTCATCTCAAAGATGAT [300]  
 AtSINA1 CTTATGCTGGTCTGAGTGTGGTGATATTCTTGTTTCATCTCAAAGATGAT [300]  
 PtSINA6 CTTATGCTGGGCTGAGTGTGGTGACATCCTTGTTTCATCTCAAGGATGAT [300]  
 PtSINA10 CTTATGCTGGGCTGAGTGTGGTGACATCCTTGTTTCATCTCAAGGACGAT [300]  
 PtSINA1 CTTATGCTGGAGCTGAATGTGGTGACATTCTCATCCATCTTAAGAATGAT [300]  
 PtSINA5 CTTATGCTGGAGCTGAATGTGGTGACATCCTTGTTTCATCTCAGAAACGAA [300]  
 OsSINA2 CATATGCAGGTTCAAGATGCGGGGATGTTCTTGTTTCATCTCATAAACGAC [300]  
 Siah1 CGTGCCCTGGTGCTTCTGTGGCTCTCTGGTAATGCATCTGATGCATCAG [297]

OsSINA5 CACAAAGTTGATATGCACGGCTGCACATTCAACCACAGATATGTCAAATC [350]  
 OsSINA1 CACAAAGTTGATATGCATGGTGCACATTCAACCATAGATATGTCAAGTC [350]  
 OsSINA3 CATAAAGTTGACATGCACGGGTGCACATTCAACCATCGCTATGTTAAGTC [350]  
 PtSINA8 CACAAAGTTGACATGCATGGGTGACTTTCAACCATCGCTATGTCAAGTC [347]  
 PtSINA3 CACAAGTTGACATGCATGGGTGACTTTCAACCATCGCTATGTCAAGTC [347]  
 PtSINA7 CACAAGTTGACATGCACGGATGACTTTCAACCATCGCTATGTGAAGTC [350]



PtSINA9 CACAAGGTGGACATGCATGGATGCACTTTCAACCATCGCTATGTGAAGTC [350]  
 MtSINA1 CATAAGGTGGACATGCACGGATGCACATTCAACCATCGTTATGTGAAGTC [350]  
 MtSINA4 CATAAGGTGGACATGCACGGATGCACATTCAACCATCGTTATGTGAAGTC [350]  
 AtSINA3 CATAAGGTGGATATGCATGGGTGTACTTTCAACCATCGTTATGTCAAGTC [350]  
 MtSINA2 CATGGGGTTGATATGCATGGATGCACTTTTAACCATCGTTATGTCAAATC [350]  
 MtSINA5 CACAGAGTTGATATGCATGGATGCACTTTTAATCATCGTTATGTCAAGTC [350]  
 SINAT5 CATAAAGTCGATATGCATGGATGTACGTTTAATCATCGTTATGTTAAATC [350]  
 AtSINA4 CATAAAGTTGACATGCACGGTTCCTACTTTTAACCACCGCTATGTCAAATC [350]  
 OsSINA6 CATAAGGTGACATGCACGGAAGCACCTTCAATCACCGTTATGTCAAATC [350]  
 OsSINA4 CACAAGGTGACATGCATGGCTGCACCTTCAACCATCGCTATGTCAAGTC [350]  
 PtSINA2 CACAAAGTTGACATGCATGGCAGTACTTTCAACCACAGATATGTCAAATC [350]  
 PtSINA4 CACAAAGTTGACATGCATGGCAGTACTTTCAATCACAGATATGTCAAATC [350]  
 MtSINA3 CACAAAGTTGACATGCATGGCTGCACTTTTAATCATCGTTACGTCAAATC [350]  
 MtSINA6 CACAAAGTTGACATGCACGGTAGCACTTTTAACCATCGTTATGTCAAATC [350]  
 AtSINA2 CATAAAGTCGATATGCATGGATGCACCTTCAACCACCGTTATGTAAAGTC [350]  
 AtSINA1 CATAAAGTTGACATGCATGGGTGCACTTTCAACCATCGTTATGTGAAGTC [350]  
 PtSINA6 CACAAGGTGACATGCATGGGTGTACCTTTAATCATCGTTATGTTAAAGTC [350]  
 PtSINA10 CACAAGGTGATATGCATGGGTGTACCTTCAATCATCGTTATGTCAAATC [350]  
 PtSINA1 CATAAGGTGATATGCATGGATGCACCTTCAATCACAGATATGTCAAGTC [350]  
 PtSINA5 CACAAAGTTGACATGCATGGATGCACCTTCAATCACAGATATGTCAAGTC [350]  
 OsSINA2 CATAAGGTGGACTTGCATGGCTGCACCTTCAACCACCGTTATGTGAAGTC [350]  
 Siah1 CATAAGTCCATTACAACCCAGGGA-----GAGGATATAGTTTTTCTTGC [341]

OsSINA5 TAATCCAGAGGTTGAGAATGCGACCTGGATGCTAACAGTGTTCTGTTTTCG [400]  
 OsSINA1 CAACCCAGAAGTCGAAAATGCCACCTGGATGCTGACGGTCTTCTGTTTTCG [400]  
 OsSINA3 AAACCCCGAGGTCGAAAATGCTACTTGGATGTTGACTGTCTTTTGCTTTG [400]  
 PtSINA8 TAATCCTGAAGTAGAAAATGCAACATGGATGTTAACAGTTTTCTGTTTTG [397]  
 PtSINA3 CAATCCTGAAGTAGAAAATGCAACATGGATGTTAACTGTTTTCTGTTTTG [397]  
 PtSINA7 TAATCCCGAAGTGGAGAATGCCACTTGGATGTTGACGGTCTTCTGTTTTG [400]  
 PtSINA9 TAATCCCGAAGTGGAGAATGCCACTTGGATGTTGACGGTCTTCTGTTTTG [400]  
 MtSINA1 AAATCCGGAAGTAGAGAATGCTACTTGGATGCTCACTGTATTTTGTTTTG [400]  
 MtSINA4 AAATCCCGAAGTAGAGAATGCAACCTGGATGCTCACAGTATTTTGTTTTG [400]  
 AtSINA3 TAATCCTGAAGTCGAAAACGCCACATGGATGTTAACTGTCTTTTGCTTCG [400]  
 MtSINA2 AAATCCTGAAGTAGAAAATGCTACTTGGATGCTAACGGTTTTCTGTTTTG [400]  
 MtSINA5 AAATCCCGAAGTAGAAAATGCTACATGGATGTTAACAGTCTTCTGTTTTG [400]  
 SINAT5 TAATCCAGAAGTAGAGAACGCTACTTGGATGCTAACGGTGTTTTGTTTTG [400]  
 AtSINA4 CAATCCGGAAGTAGAGAACGCTACTTGGATGCTAACCGTATTCTGCCTTG [400]  
 OsSINA6 AAATCCTGAAGTTGAGAATGTACCTGGATGCTCACGGTTTTCTGTTTTG [400]  
 OsSINA4 GAATCCTGAAGTTGAGAATGCCACCTGGATGCTTACGGTTTTCTGCTTTG [400]  
 PtSINA2 AAATCCAGAAGTTGAGAATGCAACATGGATGCTGACGGTTTTTGCTTTG [400]  
 PtSINA4 AAATCCAGAAGTTGAGAATGCAACATGGATGCTGACGGTCTTTTGCTTTG [400]  
 MtSINA3 AAATCCTGAAGTTGAAAATGCCACATGGATGTTAACGGTTTTTGCTTCG [400]  
 MtSINA6 AAATCCTGATGTTGAAAATGCAACATGGATGTTAACGGTTTTCTGTTTTG [400]  
 AtSINA2 AAATCCAGAGGTCGAAAATGCTACATGGATGCTTACGGTGTCTGTTTTG [400]  
 AtSINA1 AAATCCGGAGGTCGAGAATGCTACATGGATGCTTACGGTCTTCTGTTTTG [400]  
 PtSINA6 AAATCCAGAAGTTGAAAATGCCACATGGATGCTTACAGTTTTTTGTTTTG [400]  
 PtSINA10 AAATCCAGAAGTTGAAAATGCCACATGGATGCTTACTGTATTTTGTTTTG [400]  
 PtSINA1 TGATCCCGAAATCGACAATGCCACATGGATGTTAACTGTTTTTGTTTTG [400]  
 PtSINA5 TGATCCCGAAATCGACAATGCCACATGGATGTTAACTGTTTTCTGTTTTG [400]  
 OsSINA2 CAACCCGGAAGTGGAAAACGCTACATGGATGCTGACGGTTTTCTGTTTTG [400]  
 Siah1 TACAGACAATCTTCTGGTGCTGTTGACTGGGTGATGATGCAGTGTTTTTG [391]

OsSINA5 GGCAGTATTTCTGCCTGCATTTTCGAGGCGTTCCAGCTTGGAAATGGCACCA [450]  
 OsSINA1 GGCAATACTTCTGCCTGCATTTTGAGGCCTTCCAGCTTGGGATGGCACCA [450]  
 OsSINA3 GGCAGTACTTCTGCCTGCATTTTCGAGGCGTTCCAACTTGGAGTGGCTCCG [450]  
 PtSINA8 GCCAGTATTTCTGCCTTCATTTTGAAGCTTTCCAGCTTGGAGTGGCTCCT [447]  
 PtSINA3 GCCAGTATTTCTGCCTCCATTTTGAAGCTTTCCAACTCGGGATGGCTCCT [447]  
 PtSINA7 GTCAATACTTCTGCCTTCACTTTTGAAGCTTTCCAGCTTGGCATGGCCCCCT [450]  
 PtSINA9 GTCAGTACTTCTGCCTTCACTTTTGAAGCTTTCCAGCTTGGCATGGCCCCCT [450]  
 MtSINA1 GGCAATACTTCTGCCTTCACTTTTGAAGCTTTCCAGCTAGGCATGGCTCCG [450]  
 MtSINA4 GGCAATACTTCTGCCTTCACTTTTGAAGCTTTTCCAGCTTGGCATGGCCCCCT [450]

AtSINA3 GTCAATACTTCTGTCTTCACTTTGAGGCATTCCAGCTCGGAATGGCTCCA [450]  
MtSINA2 GTCAATATTTTTGTCTCCATTTTGAAGCATTCCAGCTTGAAACGTCACCT [450]  
MtSINA5 GACAATATTTCTGTCTCCATTTTGAAGCCTTTCAACTTGGAAATGGCTCCA [450]  
SINAT5 GTCAATACTTTTGTCTTCACTTTTGAAGCGTTTCCAGCTCGGTATGGCTCCA [450]  
AtSINA4 GCCAGTACTTTTGCCTGCCTTTCGAAAGCATTCCAGCTTGGGATGGGTCCA [450]  
OsSINA6 GCCAGTACTTTTGCCTGCCTTTCGAAAGCATTCCAGCTTGGGATGGCACCT [450]  
OsSINA4 GCCAGTACTTCTGCCTACATTTTGAAGCATTCCAGCTTGGGATGGCACCT [450]  
PtSINA2 GTCAGTATTTTTGTCTGCATTTTGAAGCATTCCACCTCGGGATGTCCCCA [450]  
PtSINA4 GTCAGTATTTTTGTCTACATTTTGAAGCATTCCAGCTTGGGATGGCCCCG [450]  
MtSINA3 GTCAGTATTTTTGCCTGCATTTTGAAGCTTTTCAACTGGGAATGGCTCCT [450]  
MtSINA6 GTAAGTACTTTTGTCTACATTTTGAAGCTTTTCAACTTGGAAATGGCTCCT [450]  
AtSINA2 GGAGACAGTCTGTTTACACTTCGAGGCGTTCCAGCTGGGAATGGCTCCA [450]  
AtSINA1 GAAGACAGTCTGCTTACACTTTGAGGCGTTTCCAGCTCGGGATGGCACCA [450]  
PtSINA6 GAAGACAGTCTGCTTACATTTTGAAGCTTTCCAGCTGGGATGGCACCT [450]  
PtSINA10 GAAGACAGTCTGCTTGCATTTTGAAGCTTTTCCAACTGGGATGGCACCT [450]  
PtSINA1 GCCGACAGTTTTGCTTGCATTTTGAAGCTTTTTTATAGGAATGTCACCT [450]  
PtSINA5 GCCGACAGTTTTGCCTGCCTTTCGAAAGCATTTCATCTAGGAATGTCACCT [450]  
OsSINA2 GACAGCACTTCTGCCTGCATTTTGAAGCATTCCCTGCTGGGATGGCACCA [450]  
Siah1 GCTTTCATTTTATGTTAGTCTTAGAGAAACAGGAATACGATGGTCAACCAG [441]

OsSINA5 GTTTATATGGCCTTCTCCGTTTTCATGGGGATGAGGAAGCGAGGAACATA [500]  
OsSINA1 GTCTATATGGCCTTTCTCCGTTTTCATGGGTGATGAAGAGGCAAGGAACATA [500]  
OsSINA3 GTTTACATGGCCTTCTCCGTTTTATGGGCGACGAAGATGCCAGGAACATA [500]  
PtSINA8 GTTTATATGGCATTCTCAGATTTCATGGGTGATGAGGAAGCTCGGAATTA [497]  
PtSINA3 GTTTATATGGCATTCTCAGATTTCATGGGTGATGAGGAGGCCAGGAATTA [497]  
PtSINA7 GTTTATATGGCATTCTCCGTTTTCATGGGTGATGAGGAGGCTCGGAATTA [500]  
PtSINA9 GTTTATATGGCATTCTCCGTTTTCATGGGTGATGAGGAGGCTCGGAATTA [500]  
MtSINA1 GTTTACATGGCATTCTTCCGTTTTCATGGGAGACGAGGAGGCTCGGAACATA [500]  
MtSINA4 GTTTACATGGCATTCTTCCGTTTTATGGGCGACGAAGATGCCCGGAACATA [500]  
AtSINA3 GTCTACATGGCGTTCTTCCGTTTTCATGGGGACGAGGAAGCTCGAAACATA [500]  
MtSINA2 GTTTACATGGCGTTTCTTCCGATTTCATGGGTGATGACGACGCCAAGAACATA [500]  
MtSINA5 GTTTACATGGCATTCTCCGTTTTCATGGGAGATGAAGATGCCAGGAGCTA [500]  
SINAT5 GTTTACATGGCGTTTCTGAGATTTCATGGGCGATGAAGACGCACGAAACATA [500]  
AtSINA4 GTATACATGGCATTCTGAGATTTCATGGGGACGAGGATGCACGGAGCTA [500]  
OsSINA6 GTCTACATCGCCTTCTTACGTTTCATGGGAGATGATGAAGCCAAGAACATA [500]  
OsSINA4 GTGTACATCGCCTTCTGAGTTTCATGGGTGATGACGAAGCAAAGAACATA [500]  
PtSINA2 GTCTACATAGCATTCTGAGTTTTCATGGGCGATGACGAGGCAAAGAACATA [500]  
PtSINA4 GTCTACATAGCATTCTTACGTTTTCATGGGGATGACGAGGCAAAGAACATA [500]  
MtSINA3 GTCTACATAGCATTCTTCCGTTTTATGGGCGATGATCAGGCAAAGAACATA [500]  
MtSINA6 GTCTACATAGCCTTTTTTCCGTTTTTCATGGGTGAAGATGAAGCAAAGAACATA [500]  
AtSINA2 GTGTACATGGCATTCTTCCGTTTTATGGGAGATGAGGAGGCGAAGAAAGTT [500]  
AtSINA1 GTGTACATGGCGTTTTCTAAGTTTTATGGGAGACGAGGAGGCTAAGAAAGTT [500]  
PtSINA6 GTCTATATGGCCTTCTTAAAGTTTTATGGGTGATGATGAAGCTAAGAAATT [500]  
PtSINA10 GTCTATATGGCCTTCTTAAAGTTTTATGGGTGATGATGAAGCAAAGAAATT [500]  
PtSINA1 GTTTACATGGCCTTCTTAAAGATTTCATGGGCACCGAAGAGGCAAGGAAATT [500]  
PtSINA5 GTTTACATGGCCTTCTGAGATTTCATGGGTACAGAAGAGGCAAGAGAAATT [500]  
OsSINA2 GTGTACATGGCGTTCTTACGTTTCATGGGCGAGGACGAGGCCCGGAACCTT [500]  
Siah1 CAGTCTTCCGCAATCGTACAGCTGATAGGAACACGCCAAGCTGAAAATTT [491]

OsSINA5 CACCTACAGCCTAGAGGTTGGTGGTAATGGCAGGAAGATGTGGGAAGGCC [550]  
OsSINA1 TAGCTACAGCCTTGGAGTTCGGCGCAAACGGCAGGAAAATGTGGGAGGGCC [550]  
OsSINA3 TAGTTATAGCCTTGGAGTTGGGCGCAAATGGCCGGAAGATGTGGGAGGGCC [550]  
PtSINA8 CAGCTACAGCCTGGAGGTTGGGGGAAATGGTCCGAAACTTTGGGAAGGCC [547]  
PtSINA3 CAGCTACAGCCTGGAGGTTGGGGGAAATGGTCCGAAACTATGGGAAGGCC [547]  
PtSINA7 TAGCTATAGCCTTGGAGTTCGGAGGAAATGGCAGGAAACTTTGGGAGGGTC [550]  
PtSINA9 TACCTACAGCCTTGGAGTTCGGGGACATGGCAGGAAACTGTGGGAGGGCC [550]  
MtSINA1 TACCTATAGCCTCGAGGTTGGAGCAAATGGAAGAAAATCTGGGAGGGTC [550]  
MtSINA4 CAGCTATAGCCTGGAAGTTGGGGCAAATGGCAGGAAACTATGGGAAGGTC [550]  
AtSINA3 CAATTACAGTTTTAGAAGTGGGAGGTTATGGTCCGAAAGCTGTGGGAAGGAC [550]  
MtSINA2 CAGCTACAGCTTAGAAGTGGGAGGAAATGGACGTAAACTATTTGAAGGGC [550]  
MtSINA5 CAGCTACAGCTTGGAGTAGGAGGGAGCGGACGCAAACATAACGAGGGCC [550]

SINAT5 TACATACAGTTT TAGAAGTTGGAGGCAGTGGGAGAAAACAGTGGGAAGGGC [550]  
 AtSINA4 CAGCTACAGCTTAGAAGTGGGAGGCAGTGGGAGGAAGCTATGGGAAGGAC [550]  
 OsSINA6 TAGCTACAGCCTGGAGGTGGGAGGCAGTGGTTCGGAAGATGTGGCAAGGCC [550]  
 OsSINA4 CAGCTACAGCCTGGAGGTGGGAGGCAGTGGCCGAAAATGTGGCAAGGGC [550]  
 PtSINA2 TAGTTACAGTCTTCAAGTATGTGGAAGTGGTAGGAAGATGTGGCAAGGGC [550]  
 PtSINA4 TAGTTACAGTCTTGAAGTGGGTGGTGGTGGGAGGAAGATGTGGCAAGGGC [550]  
 MtSINA3 TACCTACAGTCTTGAGGTAGGTGGTAATGGGAGAAAAGATGTGGCAGGGAC [550]  
 MtSINA6 TAGCTACAGTCTAGAGGTAGCGGAAAATGGGAGGAAGATGTGGCAAGGAC [550]  
 AtSINA2 CAGTTACAGCTTGGAAAGTAGGAGCTCATGGACGGAATTTATGGCAAGGGC [550]  
 AtSINA1 CAGTTACAGCTTGGAAAGTTGGAGCTCACAGTCGTAAACTATGGCAAGGGC [550]  
 PtSINA6 CAGTTACAGCTTAGAAGTTGGTGGGAATGGTTCGTAAACTGTGGCAAGGAC [550]  
 PtSINA10 CAGTTACAGCTTAGAAGTTGGTGGCAATGGCCGAAAATGTGGCAAGGAC [550]  
 PtSINA1 CAGTTATAGTATTGAAGTTGGTGGTAATGGAAGAAAGCTTTGGCAAGGAC [550]  
 PtSINA5 TAGTTACAGTCTTGAAGTTGGTGGAAAATGGTAGAAAAGCTTTGGCAAGGAC [550]  
 OsSINA2 CTGCTACAGCCTGGAGGTGGGCGGGAACGGGCGGAAGCTGTGGCAGGGCC [550]  
 Siah1 TGCTTACCAGCTTGAGCTAAATGGTCATAGGCGACGATTGTGGGAAGCGC [541]

OsSINA5 CTAGGAGCATCCCGCAGCCGGAAGGTGCGGGACAGCCATGACGGCCTC [600]  
 OsSINA1 CCCGAAGTGTCCGGGACAGCCGGAAGGTGCGGGACAGCCATGATGGCCTC [600]  
 OsSINA3 CCCGCAGCATAAGGGACAGCCGGAAGGTTAGGGACAGCCATGACGGCCTC [600]  
 PtSINA8 CACGGAGTATAAGAGATAGCAGGAAGGTTAGGGACAGCCATGATGGACTT [597]  
 PtSINA3 CACGGAGTATAAGAGATAGTAGGAAGGTTAGGGACAGCCATGATGGACTT [597]  
 PtSINA7 CGCGAAGTGTCCGAGATAGCCGGAAGGTGAGGGATAGTCATGACGGTCTC [600]  
 PtSINA9 CACAAAGTGTTCGAGATAGCCGAAAAGTTCAGGGATAGTCATGATGGTCTC [600]  
 MtSINA1 CACGGAGTATTTCGTGATAGCCGTAAGGTTTCGAGATAGTCACGACGGCCTC [600]  
 MtSINA4 CACGAAGTGTTCGAGATAGCCGTAAGGTTTCGGGATAGCCATGATGGTCTC [600]  
 AtSINA3 CAAGAAGCGTAAGAGACAGCAGGAAAAGTTAGAGACAGTCATGATGGACTA [600]  
 MtSINA2 CAAGAAGCATTAGAGATAGTAAGAAAAGTGAAGGATAGTCATGACGGCCTA [600]  
 MtSINA5 CAAGGAGCATTAGAGACAGCAAGAAAAGTTAGAGACAGTCATGATGGCCTC [600]  
 SINAT5 CAAGAAGTGTGAGAGATAGTAGGAAAAGTTCAGAGACAGTCATGACGGTCTT [600]  
 AtSINA4 CAAGAAGCATCAGAGATAGCAGGAAAAGTAAAGAGACAGCAACGACGGTCTC [600]  
 OsSINA6 CCCGAAGCATCAGAGACAGTAGGAAAAGTTCGGGACAGCTACGACGGCCTT [600]  
 OsSINA4 CCCGGAGCATCAGAGACAGCCGGAAGGTCCGGGATAGCTATGATGGGCTT [600]  
 PtSINA2 CTAGGAGCATTAGGGATAGCCGGAAGGTTTCGTGACAGCTTTTGATGGTCTT [600]  
 PtSINA4 CAAGGAGCATAAGGGACAGCCGAAAAGGTTTCGAGACAGTTTTTGATGGTCTG [600]  
 MtSINA3 CTAGAAGCATTAGGGAAAAGCCGCAAGGTTTCGCGACAGTTTTTGATGGTCTC [600]  
 MtSINA6 CAAGAAGCATCAGGGAAAAGTAGCAAGATCCGCGACAGTTTTTGATGGTCTT [600]  
 AtSINA2 CTAGAAGCATCCGTGACAGTAGGAAAAGTCCGGGACAGTCAAGACGGACTC [600]  
 AtSINA1 CAAGAAGCATCAGAGACAGTAGGAAAAGTCCGAGATAGTCAAGACGGACTC [600]  
 PtSINA6 CCAGGAGCATCCGTGACAGTAGGAAAAGTCCGTGACAGCCAGGATGGGCTT [600]  
 PtSINA10 CCAGGAGCATCCGTGATAGTAGGAAAAGTTCGCGATAGCCAGGATGGGCTT [600]  
 PtSINA1 CCAGAAGTATAAGGGATAGCCAGAAAAGTTAGAGACAGCCAAGATGGACTG [600]  
 PtSINA5 CGAGAAGTATCCGGGATAGCCAGAAAAGTTCGAGACAGCCAAGATGGATTG [600]  
 OsSINA2 CCCGGAGCATCAGGGACAGCAAGAAAAGTCCGGGACAGCTTCGACGGCCTC [600]  
 Siah1 CTCGATCTATTTCATGAAGGAGCAACAGCCATTATGAATAGCGACTGTCTA [591]

OsSINA5 ATCATCCAGAGGAACATGGCACTCTTCTTCTCCGGCGGTGACAGGAAGGA [650]  
 OsSINA1 ATCATCCAGAGGAACATGGCGCTGTTCTTCTCCGGGGGCGACCGAAAGGA [650]  
 OsSINA3 ATAATTCAGCGGAACATGGCTCTGTTCTTCTCAGGCGGAGAGAGGAAAAGA [650]  
 PtSINA8 GTTATACAACGTAACATGGCACTTTTTCTTCTCTGGAGGAGATAGGAAGGA [647]  
 PtSINA3 ATCATAACAACGTAACATGGCACTTTTTCTTCTCTGGAGGAGATAGGAAGGA [647]  
 PtSINA7 ATAATTCACGAAATATGGCACTTTTTCTTCTCTGGTGGGGATAGGAAGGA [650]  
 PtSINA9 ATTATTCACGAAACATGGCACTTTTTCTTCTCTGGTGGGGATAGGAAGGA [650]  
 MtSINA1 ATAATTCACGAAATATGGCCCTATTTTTCTTCTCTGGTGGTGTATAGGAAGGA [650]  
 MtSINA4 ATCATTCAAAGAAATATGGCACTATTTTTCTTCTCTGGTGGGGATAGGAAGGA [650]  
 AtSINA3 ATTATACAAAAGAAACATGGCTCTTCTTCTCAGTGGAGATAGGAAAAGA [650]  
 MtSINA2 ATCATATACCGTAACATGGCACTTTTTCTTCTCAGGTGGGGATAGAAAAGA [650]  
 MtSINA5 ATTATATACCGGAACATGGCACTTTTTCTTCTCTGGTGGAGATAGGAAAAGA [650]  
 SINAT5 ATAATCCAAAAGAAACATGGCACTCTTCTTTTTCCGGTGGAGACAAGAAAAGA [650]  
 AtSINA4 ATCATCCAAAAGAAACATGGCTCTTTTTCTTCTCCGGTGGAGACAGGAAAAGA [650]  
 OsSINA6 ATCATCCAGCGGAACATGGCCTTGTCTTCTTCTCCGGTGGCGACAAGAAAGGA [650]

OsSINA4 ATCATCCAACGGAACATGGCCCTTGTCTCTCTGGTGGAGAAAGGAAGGA [650]  
 PtSINA2 GTTATCCAGCGCAACATGGCCCTTTTATTCTCTGGTGGAGATCGGAAGGA [650]  
 PtSINA4 ATCATTCAACGCAACATGGCCCTTTTCTCTCTGGTGGGGATAGGAAGGA [650]  
 MtSINA3 ATCATTCAAGAGGAACATGGCTCTCTCTTTTCTGGGGGTGATAGGAAGGA [650]  
 MtSINA6 ATTATTCAAGGAATATGGCGCTTTTCTTTTTCAGGTGGTGACCGGAAAGA [650]  
 AtSINA2 ATCATCCCAAGGAACCTCGCACTCTACTTCTCTGGAGGTGATAGGCAAGA [650]  
 AtSINA1 ATAATCCCTAGAAACTTGGCTTTGTACTTCTCTGGCAGTGACAAAGAAGA [650]  
 PtSINA6 ATTATTCAAAGGAATTTGGCTCTCTACTTCTCTGGTGGGGATAGGCAAGA [650]  
 PtSINA10 ATTATTCAAAGGAATTTGGCTCTCTACTTCTCTGGTGGGGATAGGAAAGA [650]  
 PtSINA1 ATCATTCAAGAGAACTTGGCACTTTTCTCTCCGGAGGGGATCGGCAGGA [650]  
 PtSINA5 ATCATTCAAGAGAACTTGGCACTTTTCTTTTCTGGAGGGGAACGGCAGGA [650]  
 OsSINA2 ATCATCCACCGGAACATGGCCCTCTTCTCTCCGGCGGCAACAGGCAGGA [650]  
 Siah1 GTCTTTGACACCAGCATTGCACAGCTTTTTGCAGAAAATGGCAATTTAGG [641]

OsSINA5 GCTGAAGCTGAGGGTGACCGCCGTATCTGGAAAGAACAG [690]  
 OsSINA1 GCTGAAGCTGAGGATCACCGCCGGATCTGGAAGGAGCAG [690]  
 OsSINA3 GTTGAATTCGCGGGTACCGGCCGAATCTGGAAGGAACAG [690]  
 PtSINA8 GTTAAAGCTGCGAGTTACAGGACGGATATGGAAAGAACAG [687]  
 PtSINA3 GTTAAAGCTGCGAGTTACAGGACGGATATGGAAAGAACAG [687]  
 PtSINA7 GCTGAAGCTTAGAGTTACCGGGAGGATATGGAAGGAACAA [690]  
 PtSINA9 GCTGAAGCTAAGAGTTACCGGGAGGATATGGAAGGAACAA [690]  
 MtSINA1 ACTGAAATTAAGAGTACAGGAAGAATATGGAAAGAACAA [690]  
 MtSINA4 GTTGAAACTTAGAGTACCGGAAGAATATGGAAGGAACAG [690]  
 AtSINA3 GCTGAAACTTCGAGTCACTGGAAGGATATGGAAAGAGCAA [690]  
 MtSINA2 GTTGAAACTAAGAGTAACAGGAAGGATATGGAAAGAGCAG [690]  
 MtSINA5 GCTGAAGTTACGAGTAACAGGAAGGATATGGAAAGAACAG [690]  
 SINAT5 ACTGAAACTTAGAGTCACTGGAAGAATCTGGAAAGAGCAA [690]  
 AtSINA4 GCTTAAACTTAGAGTCACTGGTAAAATCTGGAAAGAGCAA [690]  
 OsSINA6 GCTCAAATTCGCGTGTACCGGAAGGATTTGGAAGGAGCAG [690]  
 OsSINA4 GCTCAAATTCGCGGTCACTGGGAGAATTTGGAAGGAACAG [690]  
 PtSINA2 ATTGAAGCTTCGCGGTGACTGGTTCGATTTGGAAGGAACAG [690]  
 PtSINA4 ATTGAAGCTTAGGGTGACTGGTTCGAATTTGGAAGGAACAG [690]  
 MtSINA3 ATTGAAGCTACGAGTTACCGGAAGGATTTGGAAGAGCAG [690]  
 MtSINA6 GTTGAAGCTAAGGGTTACTGGTAGGATTTGGAAGGAACAA [690]  
 AtSINA2 ACTCAAGTTGAGAGTGACTGGACGAATCTGGAAAGAGGAG [690]  
 AtSINA1 GCTCAAGTTGCGAGTCACTGGACGGATTTGGAAGGAAGAA [690]  
 PtSINA6 GCTGAAATTCGAGGGTTACTGGTTCGTGTATGGAAAGAAGAA [690]  
 PtSINA10 GCTGAAGTTGAGGGTTACTGGTTCGTGTATGGAAAGAAGAA [690]  
 PtSINA1 GTTAAAACGTAAAGTTTCAGGACGGATTTGGAAGGAACAG [690]  
 PtSINA5 GTTAAAACGTAAAGTTTCAGGACGGATTTGGAAGGAACAG [690]  
 OsSINA2 GCTCAAGCTTCGCGGTACCGGCCGCATCTGGAAGGAGCAA [690]  
 Siah1 CATCAATGTAACATTTCCATGTGT----- [666]

**Supplemental Fig. S3.** Stereomicroscopical images representing the different stages of nodule development that were harvested for qRT-PCR analysis.

From uninoculated roots, the zone just above the tip between the arrows, was harvested at the same time as the 6-dpi tissue. At 6 dpi, root sections were collected on which invading infection threads were seen. At 9 dpi, incipient nodule primordia were taken that were still white, a sign for premature symbiosis. At 16 dpi, round nodules were isolated that were pinkish, indicating the presence of leghemoglobin and initiation of nitrogen fixation, and at 40 dpi elongated fixing nodules were collected (see "Materials and Methods").

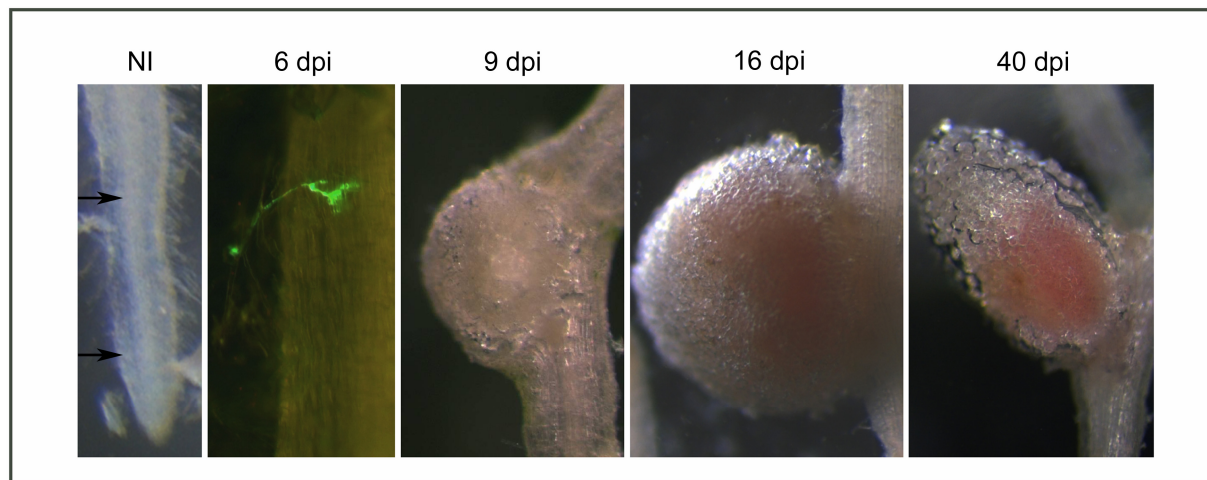

**Supplemental Fig. S4.** Co-immunoprecipitation of MtSINA1 and MtSINA3 with SINAT5DN. Immunoblots with the anti-cMYC antibody for detection of MtSINA1 and MtSINA3 proteins fused to the 3x MYC tag are shown. The upper and lower panel visualize the MYC-MtSINA proteins (33-kD fragment), present in the protein extracts before (input, 1/10 amount of the immunoprecipitated fraction) and after immunoprecipitation with the anti-HA antibody, respectively. Lanes 1 and 3 correspond to extracts from protoplasts transfected with only MtSINA3 and MtSINA1, respectively, whereas lanes 2 and 4 correspond to extracts of protoplasts cotransfected with HA-SINAT5DN (HA-SDN) and MYC-MtSINA3 and MYC-MtSINA1, respectively. Arrows mark the 33-kD band of the MtSINA proteins. The 25-kD band observed in the bottom panels corresponds to the size of the light chain of the anti-HA antibody used for immunoprecipitation. The 37-kD band in the input fraction is due to background signal in the extracts.

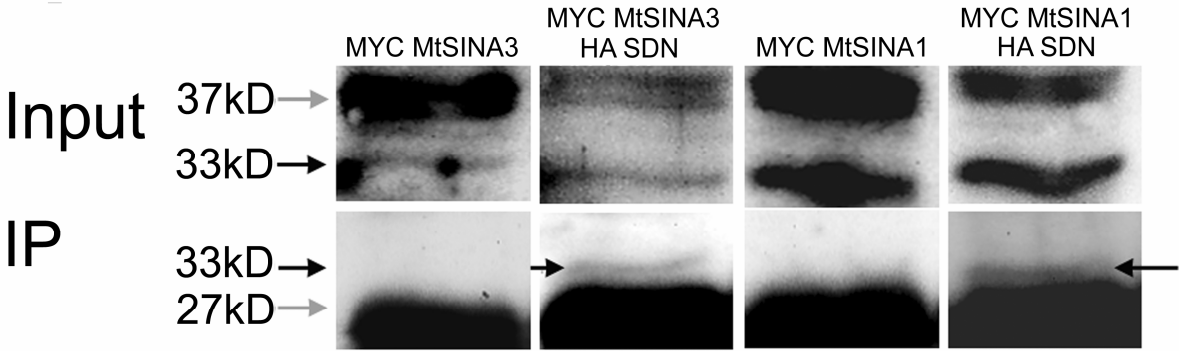

Supplement: pp.108.119453_1.pdf [file pp.108.119453_1.pdf]
